# Supplementary material for: Identification and validation of blood miRNAs as diagnostic markers of gastric cancer
Source: Preprints.org preprint supplement (doi:10.20944/preprints202308.0543.v1), 2023-08-08
Supplement: Supplementary file 1 [file supplementary]

Archive with 5 entries (5 files):
- Table S3.pdf
- Figure S1.pdf
- Figure S2.pdf
- Table S1.pdf
- Table S2.pdf
