# Supplementary material for: Identification and validation of blood miRNAs as diagnostic markers of gastric cancer
Source: Preprints.org preprint supplement (doi:10.20944/preprints202308.0543.v1), 2023-08-08
Supplement: Supplementary file 1 [file supplementary › Table S1.pdf]

**Table S1.** The most differentially expressed blood miRNAs in gastric carcinoma

| down-regulated miRNAs |        | up-regulated miRNAs |        |
|-----------------------|--------|---------------------|--------|
| miRNA                 | Number | miRNA               | Number |
| hsa-miR-125b-1-3p     | 4      | hsa-miR-1246        | 8      |
| hsa-miR-125a-3p       | 64     | hsa-miR-191-5p      | 3      |
| hsa-miR-4648          | 16     | hsa-miR-29b-1-5p    | 15     |
| hsa-miR-3184-5p       | 2      | hsa-miR-29b-3p      | 64     |
| hsa-miR-575           | 24     | hsa-miR-124-3p      | 158    |
| hsa-miR-4730          | 5      | hsa-miR-4666a-5p    | 11     |
| hsa-miR-1203          | 9      | hsa-miR-3166        | 17     |
| hsa-miR-134-3p        | 14     | hsa-miR-4436b-3p    | 29     |
| hsa-miR-4276          | 24     | hsa-miR-6073        | 26     |
| hsa-miR-6740-3p       | 17     | hsa-miR-451a        | 0      |
