# Supplementary material for: Identification and validation of blood miRNAs as diagnostic markers of gastric cancer
Source: Preprints.org preprint supplement (doi:10.20944/preprints202308.0543.v1), 2023-08-08
Supplement: Supplementary file 1 [file supplementary › Table S2.pdf]

**Table S2.** The key blood miRNAs-targeted genes in gastric cancer

| microRNA        | target genes |          |        |        |
|-----------------|--------------|----------|--------|--------|
| hsa-miR-124-3p  | COL4A1       | COL4A5   | CDH2   | FBXO17 |
|                 | CAV1         | NID1     | FSTL1  | AKT3   |
|                 | RAB34        | NR3C1    | UHRF1  | ITGB1  |
|                 | PAPSS2       | ARHGAP28 | FRMD6  | NRP1   |
|                 | PGF          | TSC22D4  | ANXA5  |        |
| hsa-miR-29b-3p  | COL4A1       | NID1     | AKT3   | ITGB1  |
|                 | PDGFRB       | PER1     | COL4A5 | COL5A2 |
| hsa-miR-4276    | RNF217       | IP6K1    |        |        |
| hsa-miR-575     | MSRB3        | BRMS1L   |        |        |
| hsa-miR-125a-3p | PRDM1        |          |        |        |
