# Supplementary material for: Identification and validation of blood miRNAs as diagnostic markers of gastric cancer
Source: Preprints.org preprint supplement (doi:10.20944/preprints202308.0543.v1), 2023-08-08
Supplement: Supplementary file 1 [file supplementary › Table S3.pdf]

**Table S3.** The correlation between key miRNAs expression and the age and gender of gastric cancer patients providing blood species

| Category        |                 | Age        |            |          | Gender |        |          |
|-----------------|-----------------|------------|------------|----------|--------|--------|----------|
|                 |                 | > 55 years | < 55 years | <i>P</i> | Male   | Female | <i>P</i> |
| <b>miR-124</b>  | No. of patients | 19         | 10         | > 0.05   | 21     | 8      | > 0.05   |
|                 | High            | 9          | 2          |          | 7      | 4      |          |
|                 | Low             | 6          | 3          |          | 5      | 4      |          |
| <b>miR-125a</b> | No. of patients | 16         | 7          | > 0.05   | 15     | 8      | > 0.05   |
|                 | High            | 4          | 1          |          | 5      | 0      |          |
|                 | Low             | 6          | 4          |          | 7      | 3      |          |
| <b>miR-29b</b>  | No. of patients | 19         | 10         | > 0.05   | 18     | 11     | > 0.05   |
|                 | High            | 7          | 4          |          | 9      | 2      |          |
|                 | Low             | 3          | 1          |          | 3      | 1      |          |
| <b>miR-4276</b> | No. of patients | 21         | 5          | > 0.05   | 17     | 9      | > 0.05   |
|                 | High            | 3          | 1          |          | 2      | 2      |          |
|                 | Low             | 8          | 2          |          | 9      | 1      |          |
| <b>miR-575</b>  | No. of patients | 24         | 5          | > 0.05   | 21     | 8      | > 0.05   |
|                 | High            | 6          | 2          |          | 8      | 0      |          |
|                 | Low             | 10         | 1          |          | 10     | 1      |          |
