# Supplementary figures and images for: Identification and validation of blood miRNAs as diagnostic markers of gastric cancer
Source: Preprints.org preprint supplement (doi:10.20944/preprints202308.0543.v1), 2023-08-08

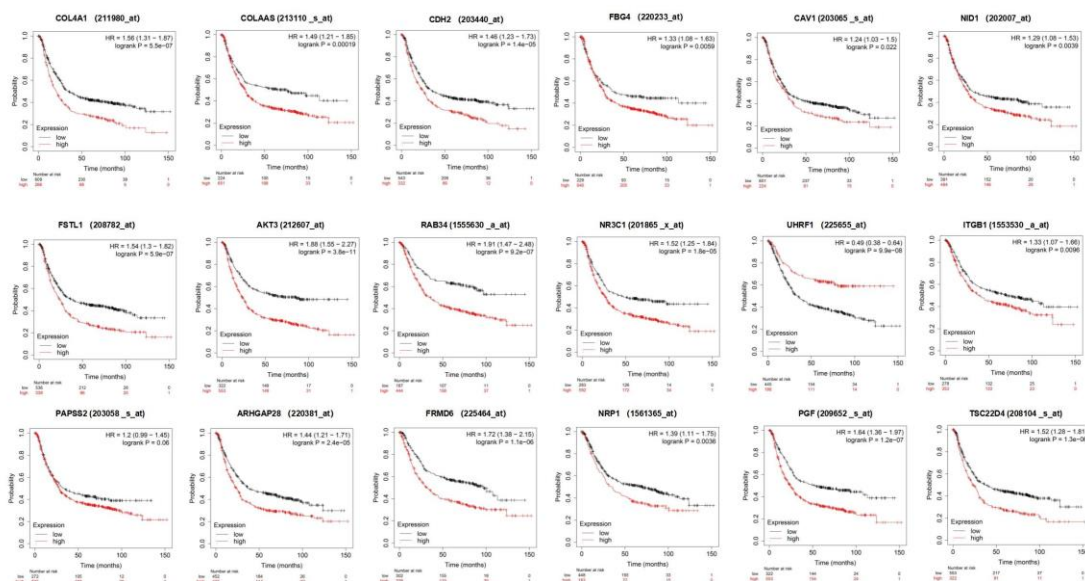

**Figure S1.** Survival analysis results of the target genes regulated by the key hsa-miR-124-3p.

Supplement: Supplementary file 1 [file supplementary › Figure S1.pdf]

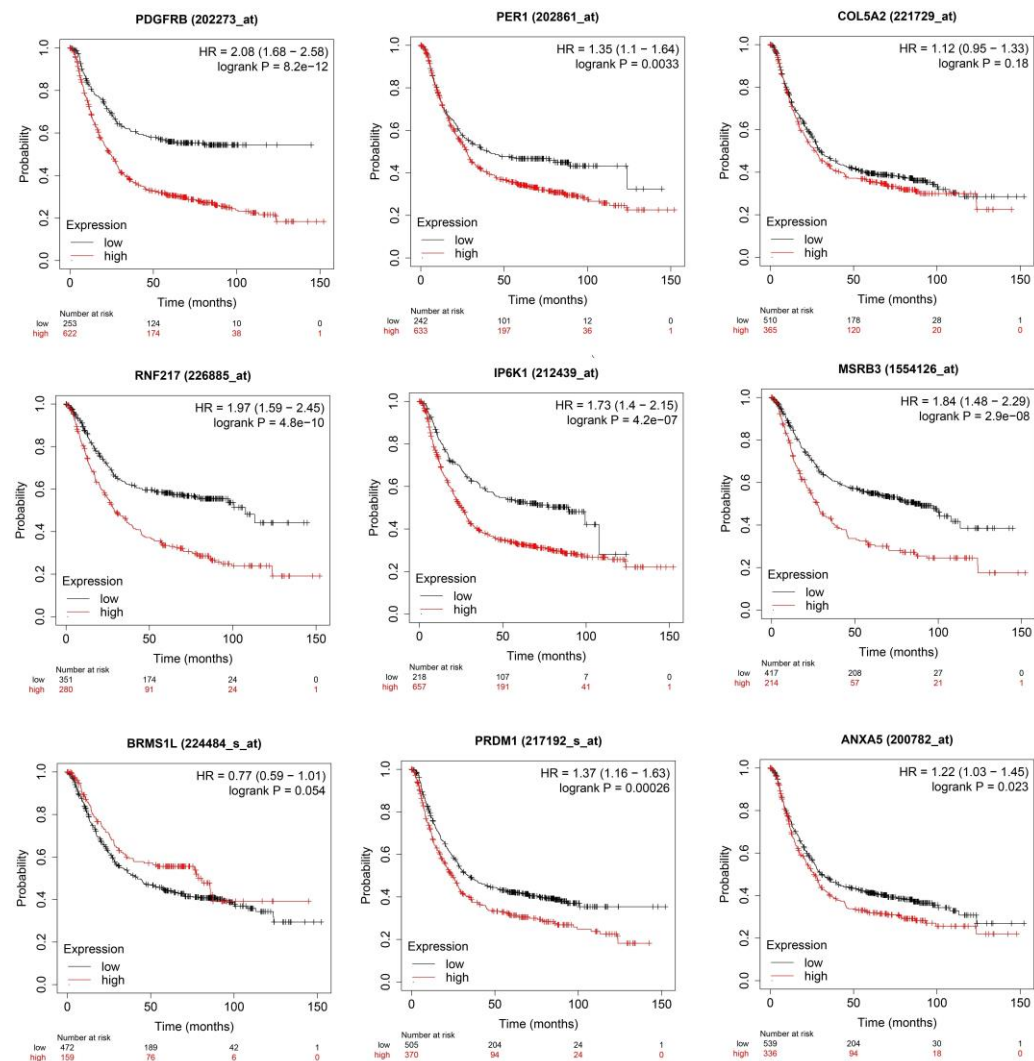

**Figure S2.** Survival analysis results of the target genes regulated by the key miRNAs.

Supplement: Supplementary file 1 [file supplementary › Figure S2.pdf]
